# Supplementary material for: Small field dosimetry for the small animal radiotherapy research platform (SARRP)
Source: Springer Nature journal article supplement (doi:10.1186/s13014-017-0936-3), 2017-12-01
Supplement: MOESM1 [file 15331886]

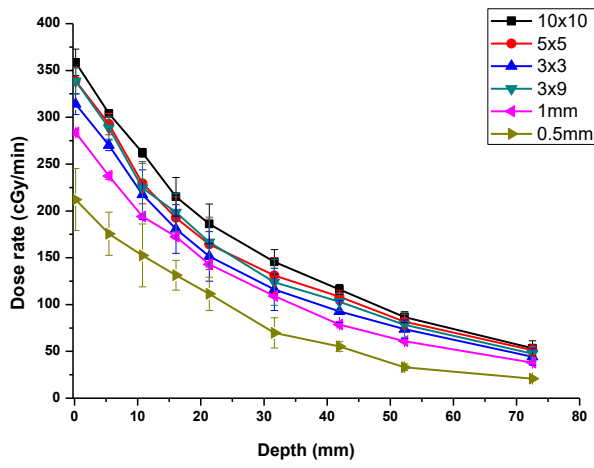

a)

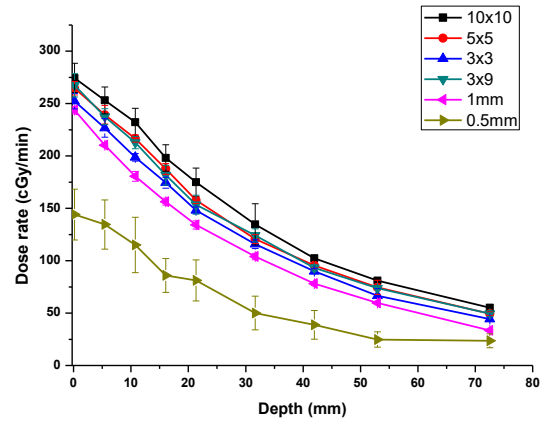

b)

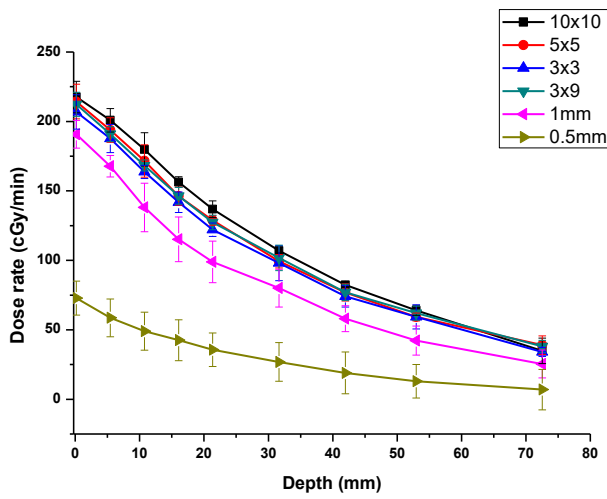

c)
