# Supplementary material for: Small field dosimetry for the small animal radiotherapy research platform (SARRP)
Source: Springer Nature journal article supplement (doi:10.1186/s13014-017-0936-3), 2017-12-01

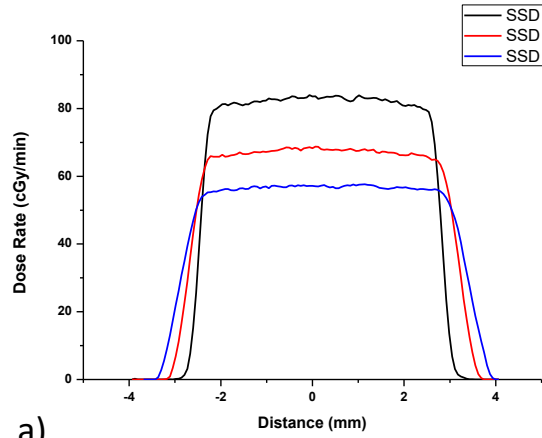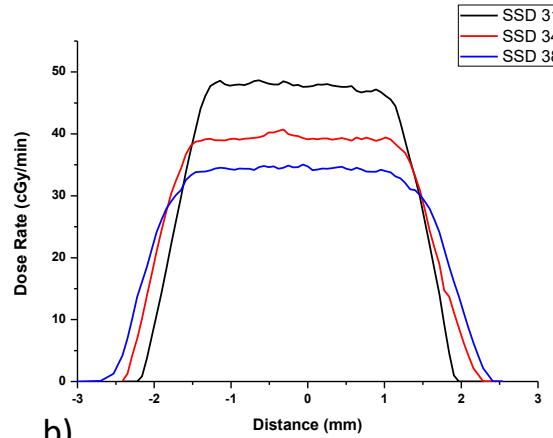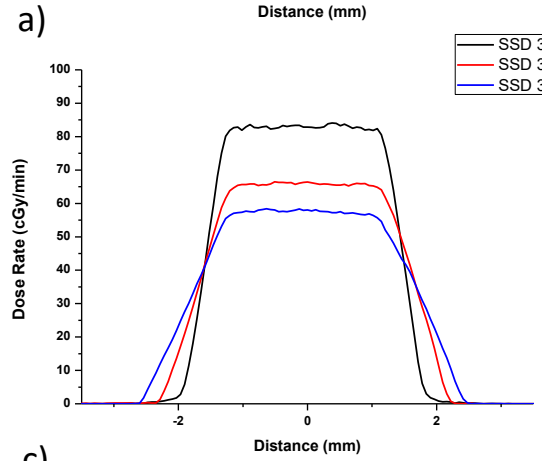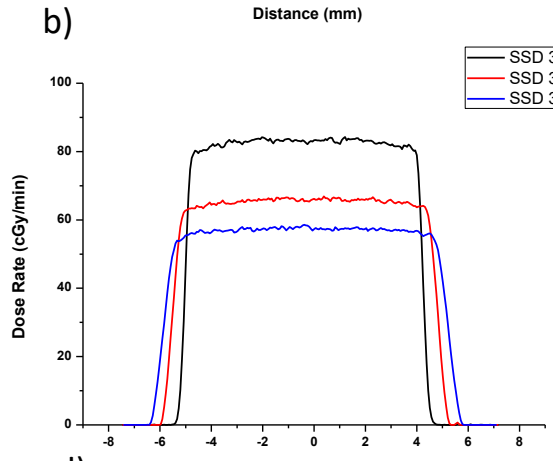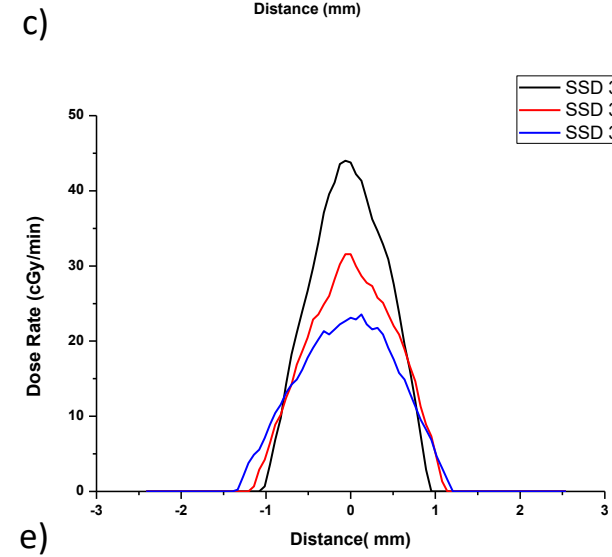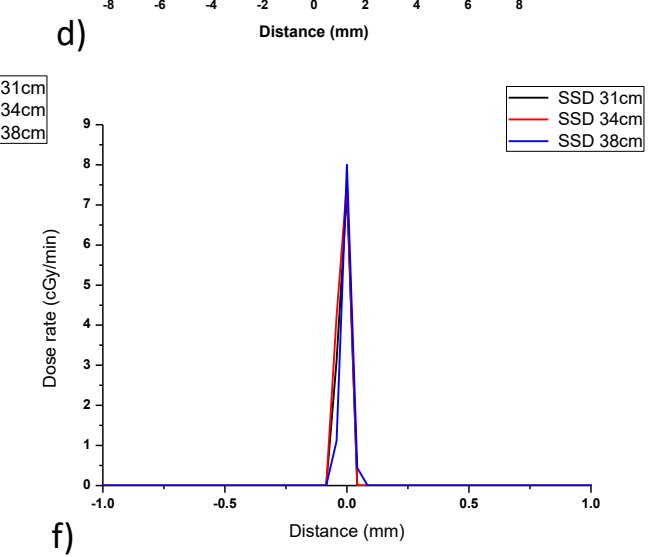

Supplement: MOESM3 [file 15331886]
